# Supplementary material
Source: publisher figshare collection journal article supplement (https://frontiersin.figshare.com/ndownloader/files/28109337)
Supplement: Supplementary file [file 28109337]

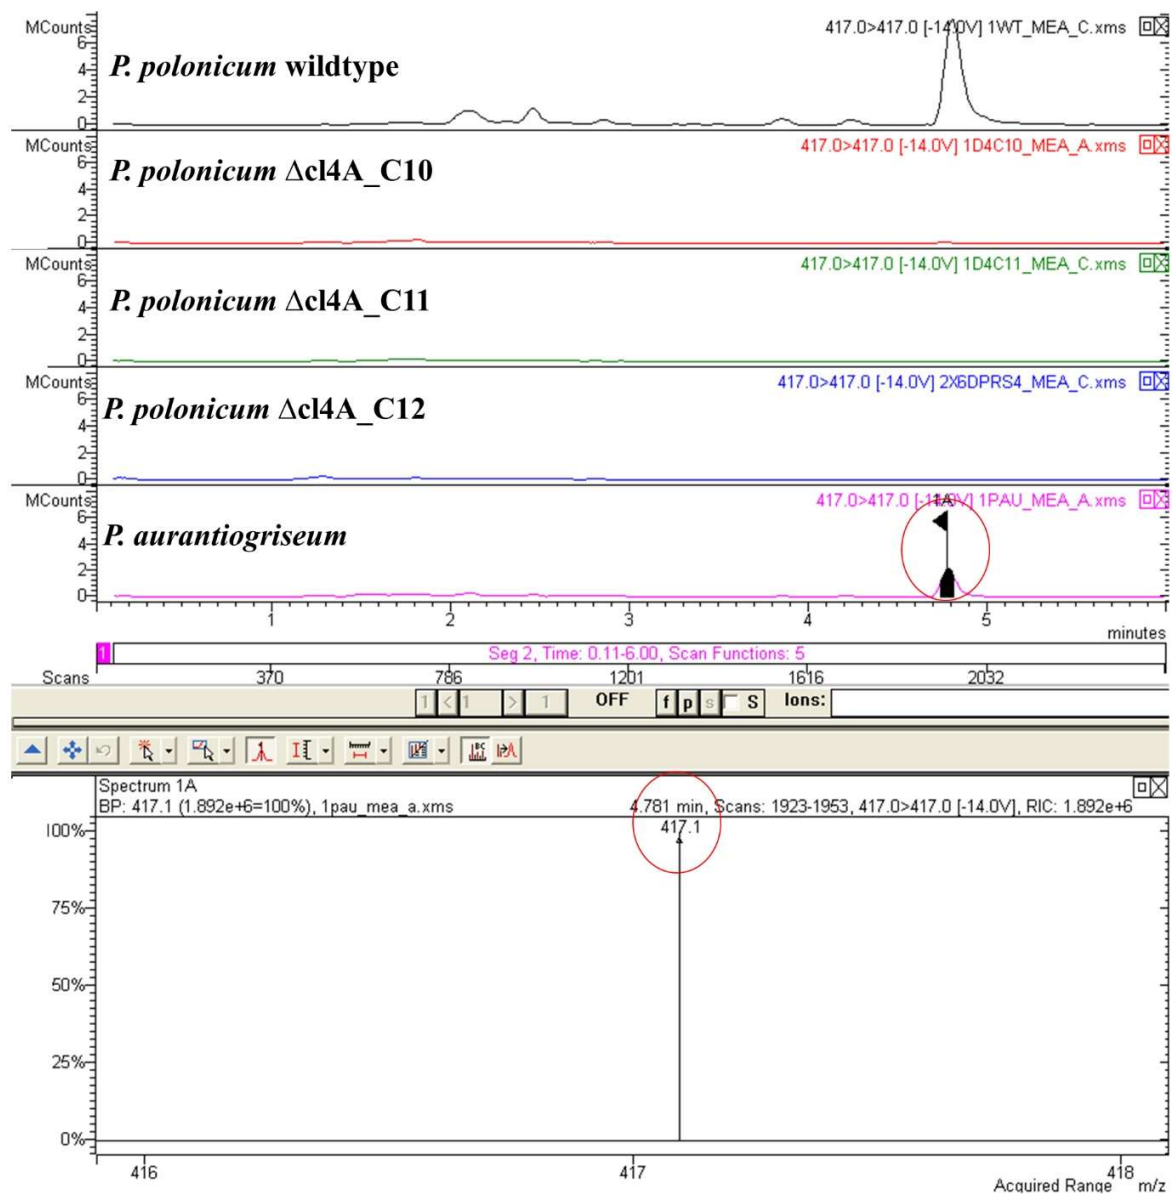

**Supplementary Figure 6.** Effect of *verA* deletion on *P. polonicum* verrucosidin production *in vitro*. Liquid chromatography-mass spectrometry (LC-MS) spectrum of *P. polonicum* wild-type,  $\Delta$ cl4A mutants and *P. aurantiogriseum* extracts. Verrucosidin chromatographic peak is encircled in red. Mass spectrum related to the chromatographic peak circled in red, which confirms the identity of verrucosidin (MW = 417). *P. aurantiogriseum* CBS 112021 able to produce verrucosidin was used as qualitative standard since the verrucosidin standard is not commercially available.
